# Supplementary material for: Immobilization of palladium(ii) acetate on a polymer-anchored Schiff base as a new heterogeneous catalyst for three-component one-Pot Mizoroki–Heck coupling via an in situ witting reaction
Source: Royal Society of Chemistry journal article supplement (doi:10.1039/d4dt03509g), 2025-01-01
Supplement: d4dt03509g1.pdf [file d4dt03509g1.pdf]

## SUPPORTING INFORMATION

### **Immobilize Palladium(II) Acetate on Polymer Anchored Schiff Base as a New Heterogenous Catalyst for the Three Multicomponent One-Pot Mizoroki Heck Coupling via *in situ* Wittig Reaction.**

Akash V. Gujarati<sup>a</sup>, Divyesh K. Patel<sup>a\*</sup>

<sup>a</sup>Department of Chemistry, Faculty of Science, The M.S. University of Baroda, Vadodara-390002, India

\*Corresponding author at: Department of Chemistry, Faculty of Science, The M.S. University of Baroda, Vadodara-390002, India

Email: [divyesh.patel-chem@msubaroda.ac.in](mailto:divyesh.patel-chem@msubaroda.ac.in)

#### \* INDEX

|                                                                                  | <b>Page No.</b> |
|----------------------------------------------------------------------------------|-----------------|
| 1) General Information.....                                                      | S02             |
| 2) Characterization data of catalyst.....                                        | S03             |
| 3) Characterization data of synthesized compounds.....                           | S09             |
| 4) References.....                                                               | S12             |
| 5) <sup>1</sup> H-NMR and <sup>13</sup> C-NMR data of synthesized compounds..... | S13             |

## 1. General Information

All the reactions were conducted with N<sub>2</sub> protection. All Chemicals were purchased from Merck(Sigma-Aldrich), TCI, AVRA, and SRL Chemical Company. <sup>1</sup>H NMR and <sup>13</sup>C NMR spectra were recorded on Bruker Avance neo 400 spectrometers. Chemical shifts are reported in ppm relative to TMS as an internal standard. Chemical shifts were recorded in parts per million (ppm, δ) relative to tetramethylsilane (δ 0.00) or chloroform (d = 7.26, singlet). <sup>1</sup>H-NMR splitting patterns are designated as singlet (s), doublet (d), triplet (t), quartet (q), dd (doublet of doublets), m (multiplets). All first-order splitting patterns were assigned on the basis of the appearance of the multiplet. Splitting patterns that could not be easily interpreted are designated as multiplet(m) or broad (br). The reactions were monitored by TLC on silica-gel 60 F<sub>254</sub> plates. IR Spectra were recorded on Bruker spectrometer as KBr pellets. The morphology of the catalyst was examined by scanning electron microscopy field-emission scanning electron microscopy (FESEM, Model-JSM7610F PLUS), and TEM images were recorded using a TEM microscope (JEOL JEM 2100 PLUS). The elemental composition was determined by elemental mapping using TEM (JEOL JEM 2100 PLUS). TG-DTA measurements were carried out on an SII EXTRAR600TG-DTA instrument.

## 2. Characterization of catalyst

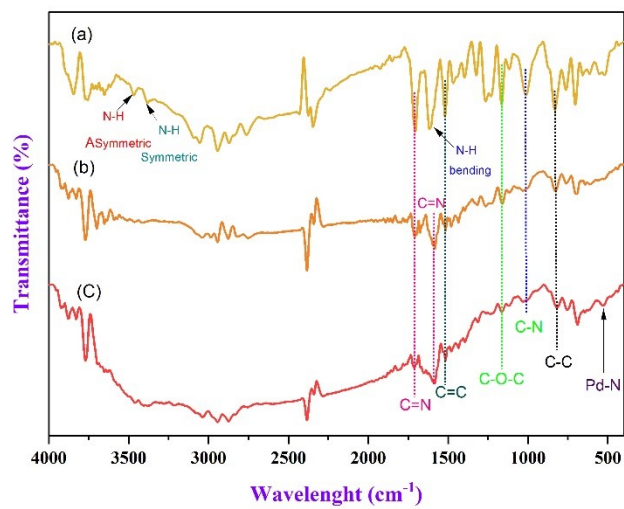

**Figure S1.** FT-IR spectra of (a) PS-H<sup>1</sup>L, (b) PS-H<sup>2</sup>L, (c) PS@Pd(OAc)<sub>2</sub>

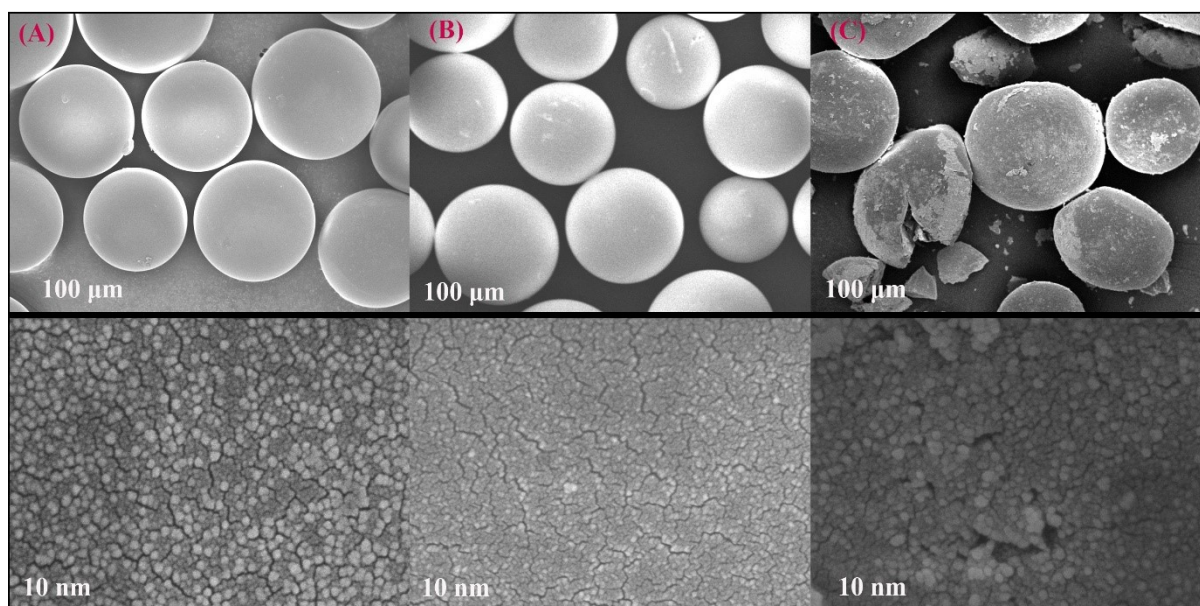

**Figure S2.** FESEM images of (A) PS-H<sup>1</sup>L, (B) PS-H<sup>2</sup>L, (C) PS@Pd(OAc)<sub>2</sub>

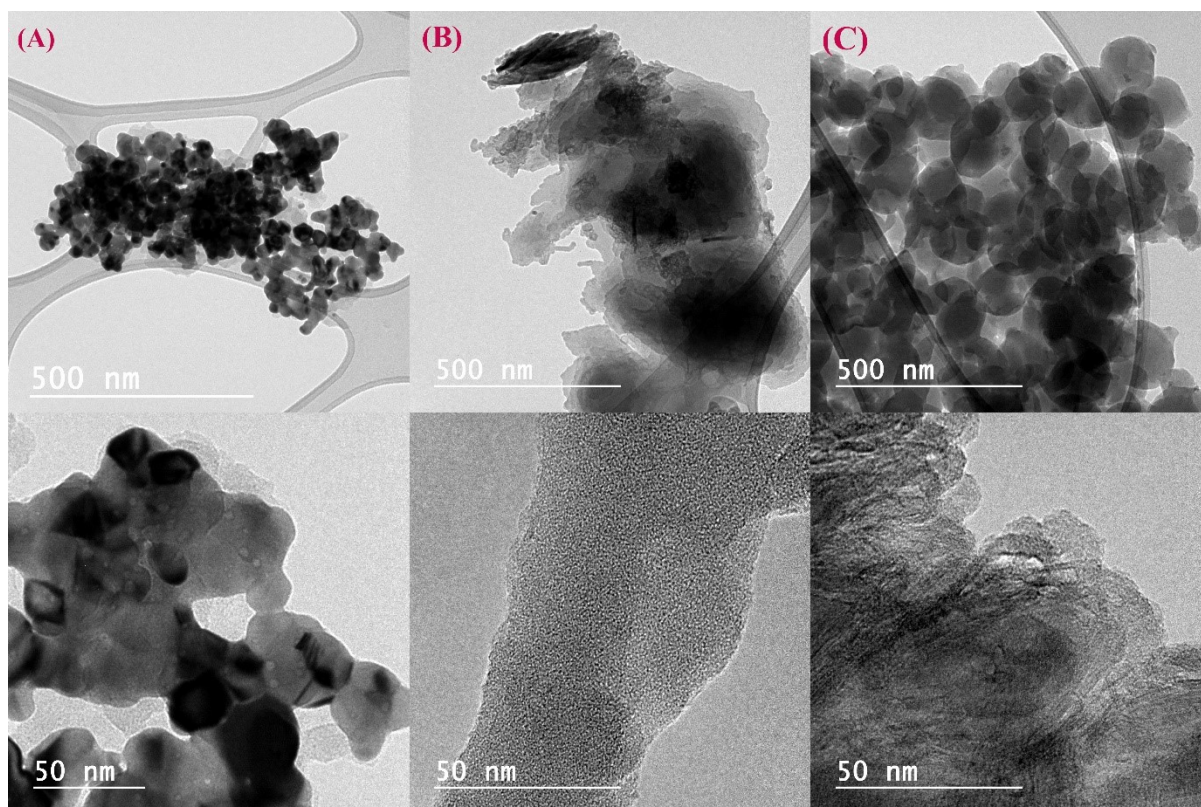

**Figure S3.** HRTEM images of (a) PS-H<sup>1</sup>L, (b) PS-H<sup>2</sup>L, (c) PS@Pd(OAc)<sub>2</sub>

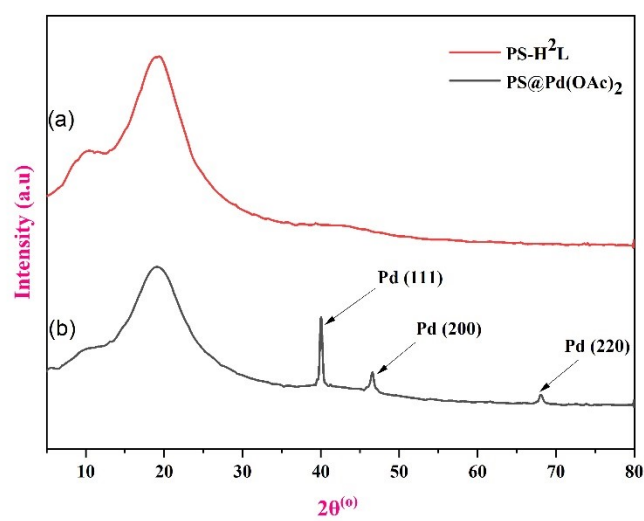

**Figure S4.** Powder XRD analysis of (a) PS-H<sup>2</sup>L, (b) PS@Pd(OAc)<sub>2</sub>

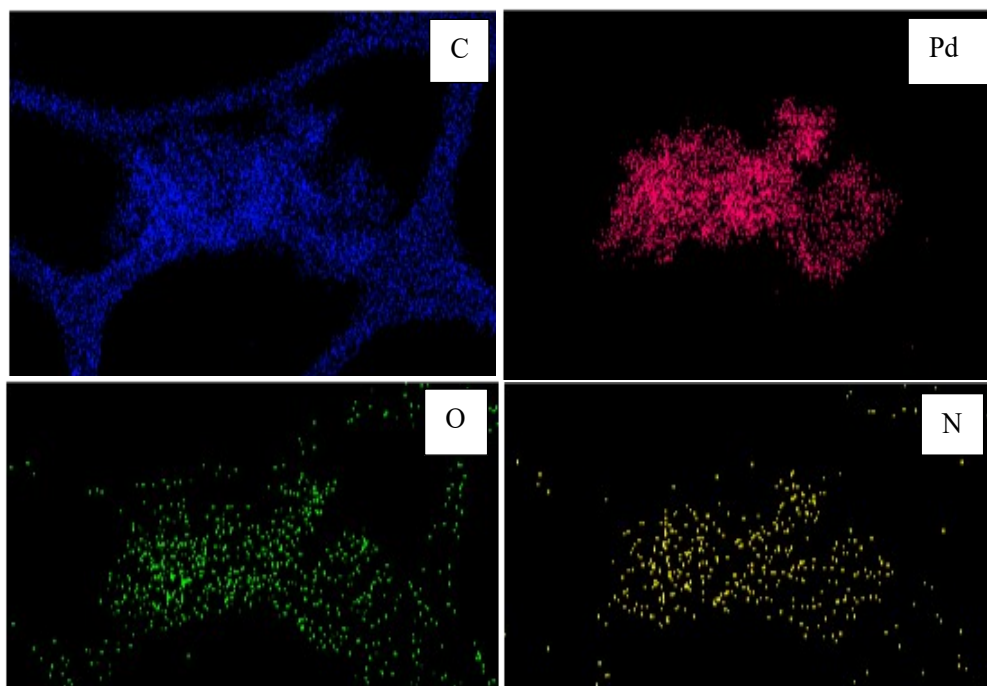

**Figure S5.** Elemental Mapping analysis images of PS@Pd(OAc)<sub>2</sub> for key elements  
(a) C (b) Pd (c) O (d) N

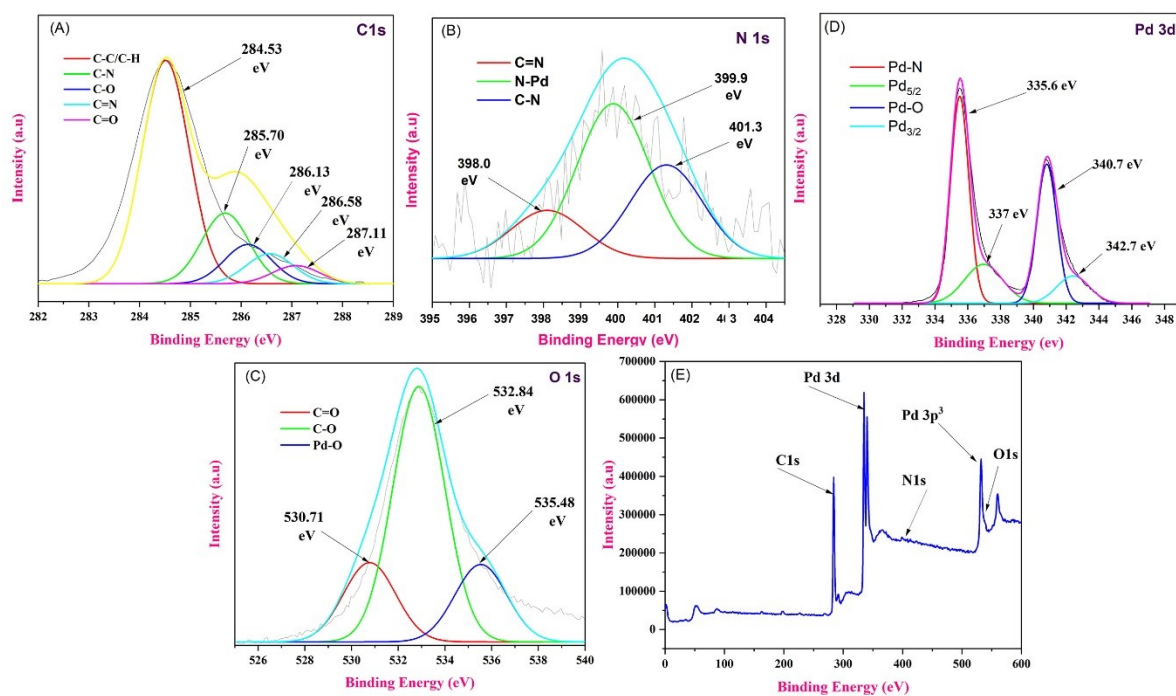

**Figure S6.** (A) C 1s scan XPS spectrum of PS@Pd(OAc)<sub>2</sub>. (B) N 1s scan XPS spectrum of PS@Pd(OAc)<sub>2</sub>. (C) O 1s scan XPS spectrum of PS@Pd(OAc)<sub>2</sub>. (D) Pd 3d scan XPS spectrum of PS@Pd(OAc)<sub>2</sub> and (E) Full Scan XPS spectrum of PS@Pd(OAc)<sub>2</sub>

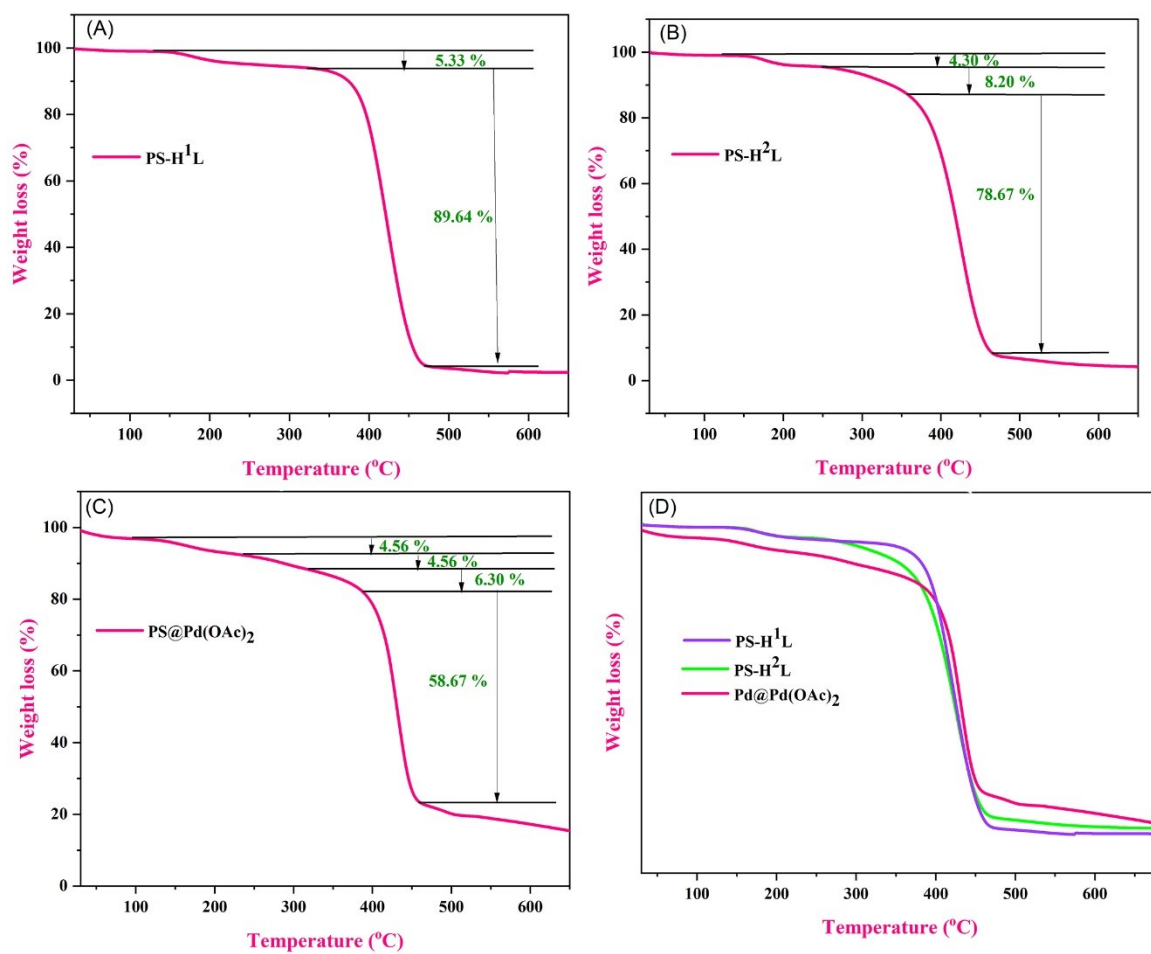

**Figure S7.** TGA spectra of (a) PS-H<sup>1</sup>L, (b) PS-H<sup>2</sup>L, (c) PS@Pd(OAc)<sub>2</sub> (D) comparison spectra between PS-H<sup>1</sup>L, PS-H<sup>2</sup>L and PS@Pd(OAc)<sub>2</sub>

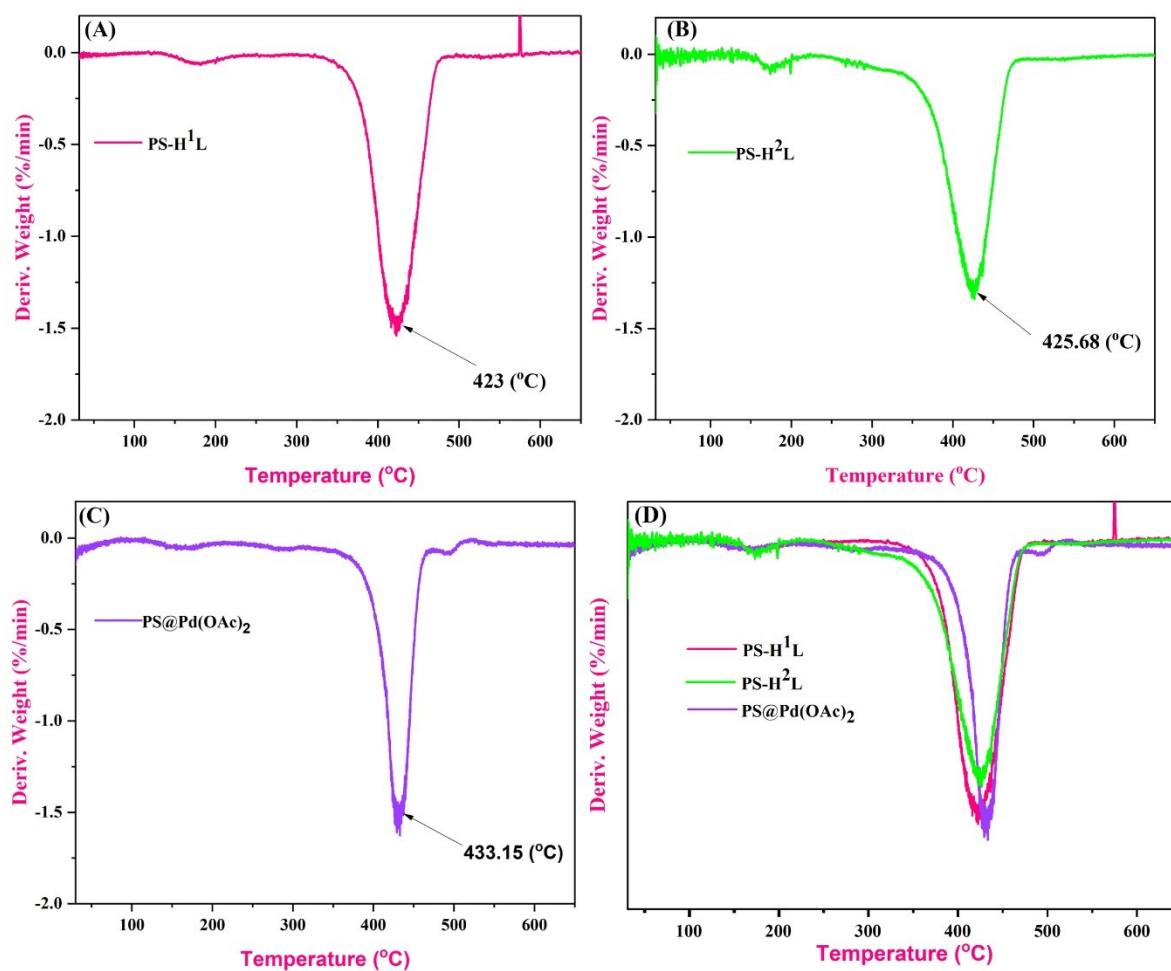

**Figure 8.** DTGA spectra of (a) PS-H<sup>1</sup>L, (b) PS-H<sup>2</sup>L, (c) PS@Pd(OAc)<sub>2</sub> (D) Comparison spectra between PS-H<sup>1</sup>L, PS-H<sup>2</sup>L and PS@Pd(OAc)<sub>2</sub>

### 3. Characterization data of synthesized compounds



### 1) (E)-1-bromo-4-styrylbenzene

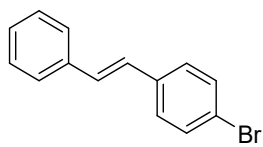

Following the general procedure, compound was purified by column chromatography over silica gel and mixture of diethyl ether or ethyl acetate in petroleum ether (05:95).

**Colour:** White solid (90 % yield);

**<sup>1</sup>H NMR:** (400 MHz, CDCl<sub>3</sub>): δ 6.64 (d, *J* = 16.0 Hz, 2H), 6.78 (d, *J* = 16.0 Hz, 2H), 7.26 (d, *J* = 6.0 Hz, 2H), 7.35-7.40 (m, 5H), 7.48 (d, *J* = 8.0 Hz, 2H).

**<sup>13</sup>C NMR:** δ 121.06, 127.45, 128.45, 128.89, 129.03, 130.63, 131.13, 131.46, 136.18, 136.91.

### 2) (E)-1-nitro-4-styrylbenzene

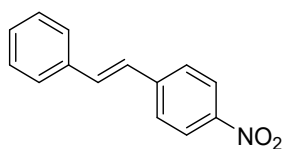

Following the general procedure, compound was purified by column chromatography over silica gel and mixture of diethylether or ethyl acetate in petroleum ether (05:95).

**Colour:** Light yellow solid (93 % yield)

**<sup>1</sup>H NMR:** (400 MHz, CDCl<sub>3</sub>): δ 6.63 (d, *J* = 16.4 Hz, 1H), 6.86 (d, *J* = 16.4 Hz, 1H), 7.21-7.24 (m, 2H), 7.26-7.28 (m, 3H), 7.39 (d, *J* = 8.8 Hz, 2H), 8.09 (d, *J* = 8.8 Hz, 2H).

**<sup>13</sup>C NMR:** δ 123.60, 124.20, 126.89, 127.98, 128.58, 129.68, 133.32, 133.96, 136.10, 174.44.

### 3) (E)-1-nitro-2-styrylbenzene

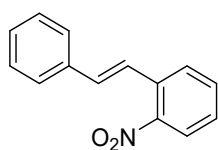

Following the general procedure, compound was purified by column chromatography over silica gel and mixture of diethylether or ethyl acetate in petroleum ether (05:95).

**Colour:** Light yellow solid (74 % yield)

**<sup>1</sup>H NMR:** (400 MHz, CDCl<sub>3</sub>): δ 6.78 (d, *J* = 16.0 Hz, 1H), 6.91 (d, *J* = 16.0 Hz, 1H), 7.02-7.08 (m, 2H), 7.14-7.24 (m, 4H), 7.40-7.42 (m, 2H), 8.10-8.12 (m 1H).

**<sup>13</sup>C NMR:** δ 123.89, 124.20, 126.89, 127.98, 128.01, 128.58, 128.88, 128.93, 129.68, 133.96, 136.10, 146.32.

### 4) (E)-1-methyl-4-styrylbenzene

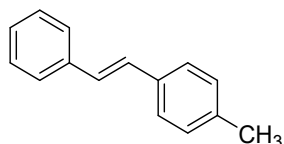

Following the general procedure, compound was purified by column chromatography over silica gel and mixture of diethylether or ethyl acetate in petroleum ether (05:95).

**Colour:** White solid (84 % yield)

**<sup>1</sup>H NMR:** (400 MHz, CDCl<sub>3</sub>) : δ 2.37 (s, 3H), 6.62 (s, 2H), 7.05 (d, *J* = 8.0 Hz, 2H), 7.21 (d, *J* = 8.0 Hz, 2H), 7.23-7.35 (m, 5H).

**<sup>13</sup>C NMR:** δ 22.71, 126.97, 126.19, 128.79, 120.84, 128.90, 129.55, 130.20, 137.50.

### 5) (*E*)-1,2-diphenylethene

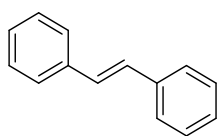

Following the general procedure, compound was purified by column chromatography over silica gel and mixture of diethylether or ethyl acetate in petroleum ether (05:95).

**Colour:** White solid (89 % yield)

**<sup>1</sup>H NMR:** (400 MHz, CDCl<sub>3</sub>): δ 6.71 (s, 2H), 7.43-7.36 (m, 2H), 7.38-7.40 (m, 3H), 7.42-7.44 (m, 5H).

**<sup>13</sup>C NMR:** δ 127.09, 128.21, 128.88, 130.25, 137.25.

### 6) (*E*)-1-isopropyl-4-styrylbenzene

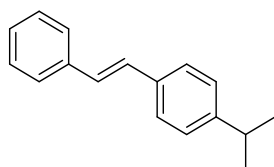

Following the general procedure, compound was purified by column chromatography over silica gel and mixture of diethylether or ethyl acetate in petroleum ether (05:95).

**Colour:** White solid (86 % yield)

**<sup>1</sup>H NMR:** (400 MHz, CDCl<sub>3</sub>): δ 1.50 (s, 6H), 3.01-3.08 (m, 1H), 6.74-6.78 (m, 2H), 7.25-7.26 (m, 2H), 7.35-7.42 (m, 5H), 7.48-7.50 (m, 2H).

**<sup>13</sup>C NMR:** δ 24.21, 30.12, 34.12, 126.48, 127.23, 128.47, 129.11, 129.18, 129.80, 130.46, 134.89, 137.82, 148.03.

**7) (E)-1-fluoro-4-styrylbenzene**

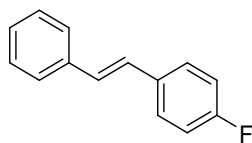

Following the general procedure, compound was purified by column chromatography over silica gel and mixture of diethylether or ethyl acetate in petroleum ether (05:95).

**Colour:** White solid (92 % yield)

**<sup>1</sup>H NMR:** (400 MHz, CDCl<sub>3</sub>): δ 6.75-6.86 (m, 2H), 7.10-7.14 (m, 2H), 7.44-7.50 (m, 7H).

**<sup>13</sup>C NMR:** δ 121.06, 127.45, 128.45, 128.89, 129.03, 130.63, 131.13, 131.46, 136.18, 162.91.

**8) (E)-1-chloro-4-styrylbenzene**

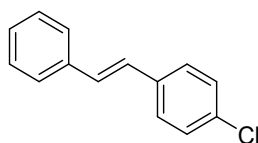

Following the general procedure, compound was purified by column chromatography over silica gel and mixture of diethylether or ethyl acetate in petroleum ether (05:95).

**Colour:** White solid (87 % yield)

**<sup>1</sup>H NMR:** (400 MHz, CDCl<sub>3</sub>): δ 6.69 (d, *J* = 15.6 Hz, 1H), 6.81 (d, *J* = 15.6 Hz, 1H), 7.29 (m, 2H), 7.35-7.45 (m, 8H)

**<sup>13</sup>C NMR:** δ 127.40, 128.42, 128.49, 128.88, 128.98, 130.29, 131.01, 132.83, 135.69, 136.92.

**09) (E)-1-methyl-2-styrylbenzene**

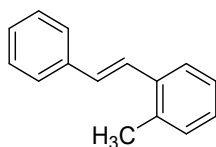

Following the general procedure, compound was purified by column chromatography over silica gel and mixture of diethylether or ethyl acetate in petroleum ether (05:95).

**Colour:** White solid (72 % yield)

**<sup>1</sup>H NMR:** (400 MHz, CDCl<sub>3</sub>): δ 2.40 (s, 3H), 6.71-6.80 (m., 2H), 7.15-7.18 (m, 1H), 7.25-7.32 (m, 8H).

**<sup>13</sup>C NMR:** δ 19.99, 125.83, 127.15, 127.34, 128.19, 128.99, 129.03, 129.64, 130.18, 130.63, 136.18, 137.13, 137.22.

#### 10) (E)-1,3-dichloro-2-styrylbenzene

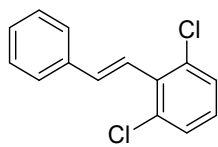

Following the general procedure, compound was purified by column chromatography over silica gel and mixture of diethylether or ethyl acetate in petroleum ether (05:95).

**Colour:** White solid (77 % yield)

**<sup>1</sup>H NMR:** (400 MHz, CDCl<sub>3</sub>): δ 7.15-7.18 (m, 1H), 7.29-7.34 (m, 2H), 7.45-7.53 (m, 5H), 7.69-7.70 (m, 2H).

**<sup>13</sup>C NMR:** δ 122.71, 126.97, 128.17, 128.52, 128.73, 128.90, 134.76, 136.93, 137.20.

#### 4. References.

- (1) Wang, M. L.; Xu, H.; Li, H. Y.; Ma, B.; Wang, Z. Y.; Wang, X.; Dai, H. X. Mizoroki-Heck Reaction of Unstrained Aryl Ketones via Ligand-Promoted C-C Bond Olefination. *Org Lett* 2021, 23 (6), 2147–2152. <https://doi.org/10.1021/acs.orglett.1c00296>.
- (3) Jia, X.; Frye, L. I.; Zhu, W.; Gu, S.; Gunnoe, T. B. Synthesis of Stilbenes by Rhodium-Catalyzed Aerobic Alkenylation of Arenes via C-H Activation. *J Am Chem Soc* 2020, 142 (23), 10534–10543. <https://doi.org/10.1021/jacs.0c03935>.

## 5. <sup>1</sup>H-NMR and <sup>13</sup>C-NMR data of synthesized compounds

HC 1 AKASH 1H 22/12/2023  
CDCL3 {D:\SRC} MSU-Chem 1

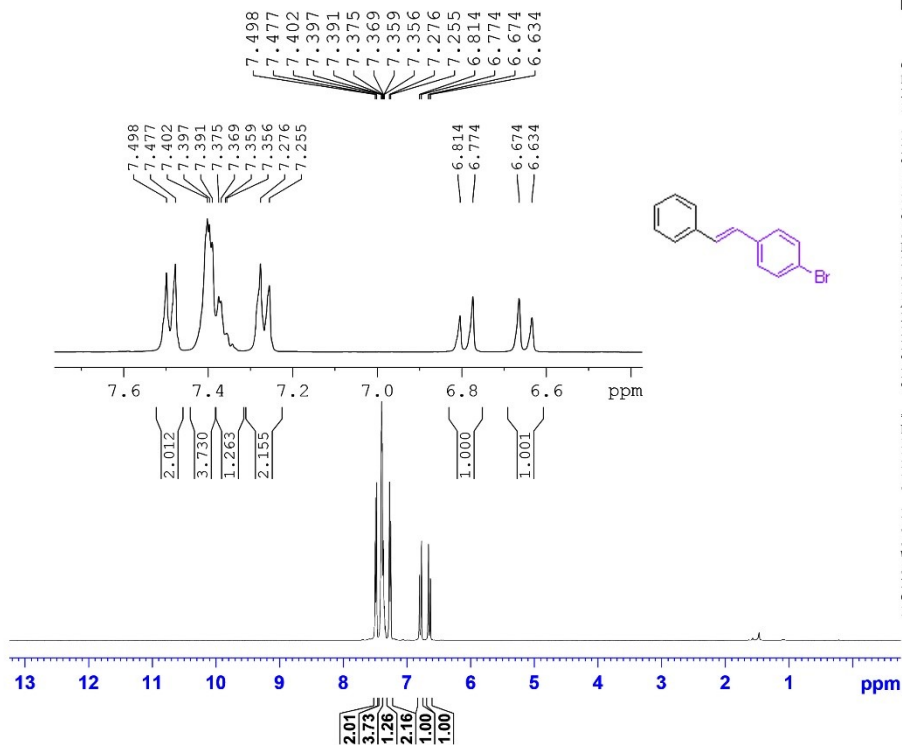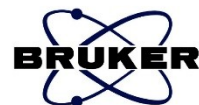

Current Data Parameters  
NAME HC 1  
EXPNO 17  
PROCNO 1

F2 - Acquisition Parameters  
Date 20231221  
Time 16.34  
INSTRUM spect  
PROBHD 5 mm PABBO BB-  
PULPROG zg30  
TD 65536  
SOLVENT CDCL3  
NS 16  
DS 2  
SWH 8223.685 Hz  
FIDRES 0.125483 Hz  
AQ 3.9845889 sec  
RG 90.5  
DW 60.800 usec  
DE 6.50 usec  
TE 291.3 K  
D1 1.0000000 sec  
TDO 1

===== CHANNEL f1 =====  
NUC1 1H  
P1 15.00 usec  
PL1 -1.00 dB  
PL1W 13.59779358 W  
SFO1 400.1524711 MHz

F2 - Processing parameters  
SI 32768  
SF 400.1500000 MHz  
WDW EM  
SSB 0  
LB 0.30 Hz  
GB 0  
PC 1.00

JC 1 AKASH CDCL3 13C 22/05/2024

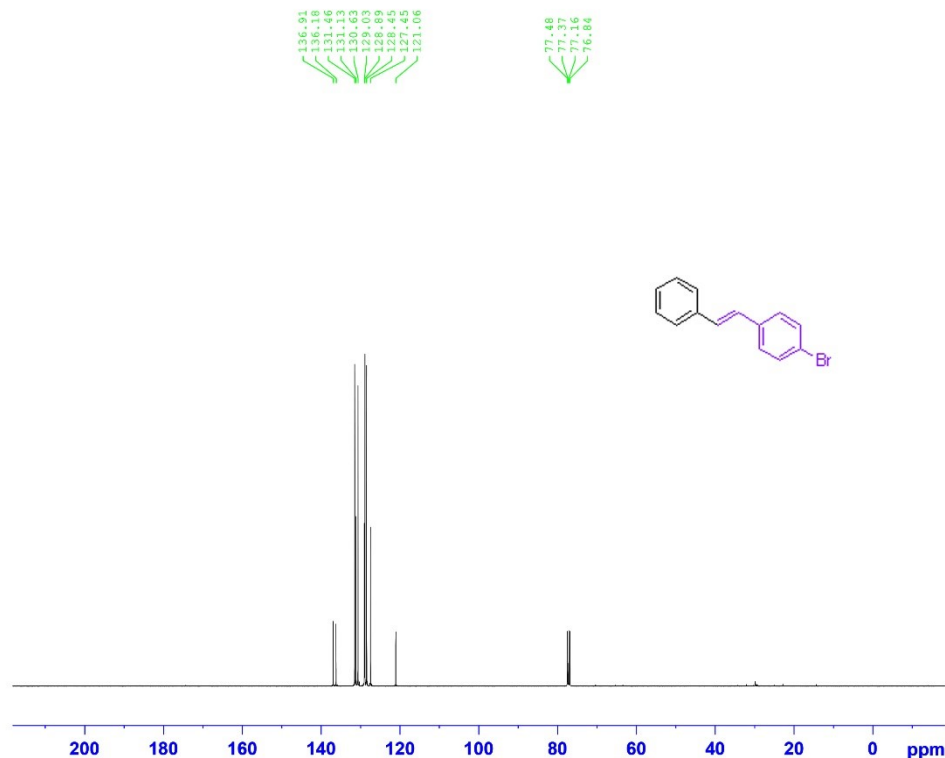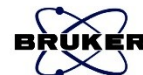

Current Data Parameters  
NAME JC 1  
EXPNO 10  
PROCNO 1

F2 - Acquisition Parameters  
Date 20240522  
Time 16.12 h  
INSTRUM AvanceNeo 400  
PROBHD Z163739\_0522 (4  
PULPROG zgpg30  
TD 65536  
SOLVENT cdcl3  
NS 801  
DS 4  
SWH 23809.524 Hz  
FIDRES 0.726609 Hz  
AQ 1.3762560 sec  
RG 101  
DW 21.000 usec  
DE 6.50 usec  
TE 298.0 K  
D1 2.0000000 sec  
D11 0.0300000 sec  
TDO 1  
SFO1 100.6278593 MHz  
NUC1 13C  
P1 2.67 usec  
PL1 8.00 usec  
PLM1 105.26999664 W  
SFO2 400.1516006 MHz  
NUC2 1H  
CPDPRG[2] waltz65  
PCPD2 90.00 usec  
PLM2 22.58300018 W  
PLM12 0.17843001 W  
PLM13 0.08975100 W

F2 - Processing parameters  
SI 32768  
SF 100.6177975 MHz  
WDW EM  
SSB 0  
LB 1.00 Hz  
GB 0  
PC 1.40

HC-3 AAKASH 1H 2/1/2024  
 CDCL3 {D:\SRC} MSU-Chem 1

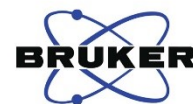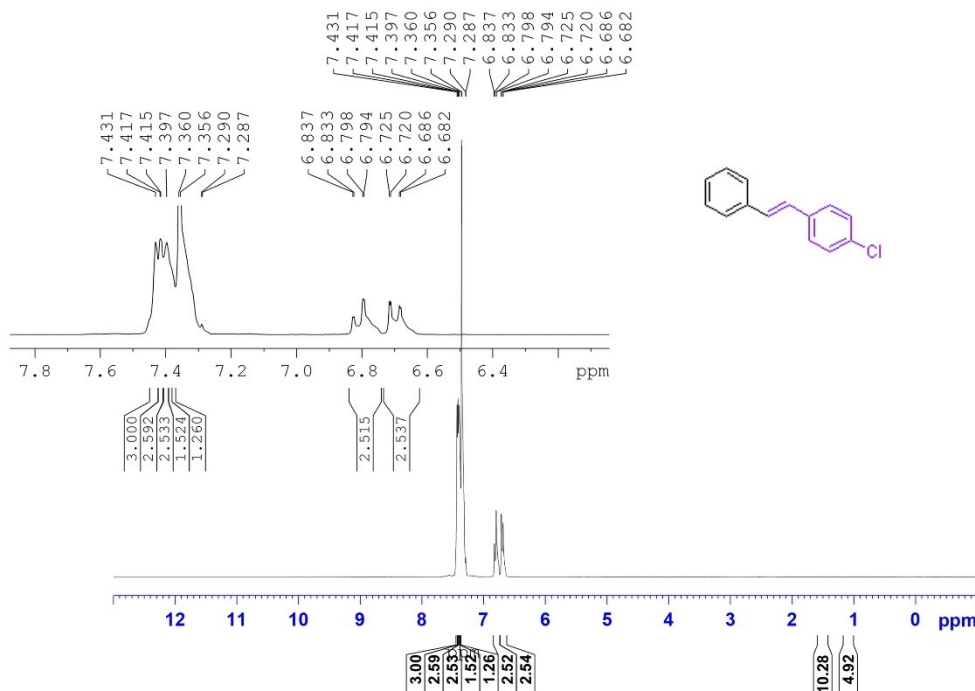

Current Data Parameters  
 NAME HC-3  
 EXNO 49  
 PROCNO 1

F2 - Acquisition Parameters  
 Date\_ 20240122  
 Time 16.26  
 INSTRUM spect1  
 PROBHD 5 mm PABBO BBI-  
 PULPROG zg30  
 TD 65536  
 SOLVENT CDCl3  
 NS 16  
 DS 2  
 SWH 8223.685 Hz  
 FIDRES 0.125483 Hz  
 AQ 3.3845889 sec  
 RG 50.8  
 DW 60.800 usec  
 DE 6.50 usec  
 TE 294.1 K  
 D1 1.00000000 sec  
 TDO 1

----- CHANNEL f1 -----  
 NUCL1 1H  
 P1 15.00 usec  
 PL1 -1.00 dB  
 PL1W 13.59779358 W  
 SFO1 400.1524711 MHz

F2 - Processing parameters  
 SI 32768  
 SF 400.1500000 MHz  
 WDW EM  
 SSB 0  
 LB 0.30 Hz  
 GB 0  
 PC 1.00

JC 3 AKASH CDCL3 13C 22/05/2024

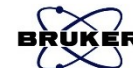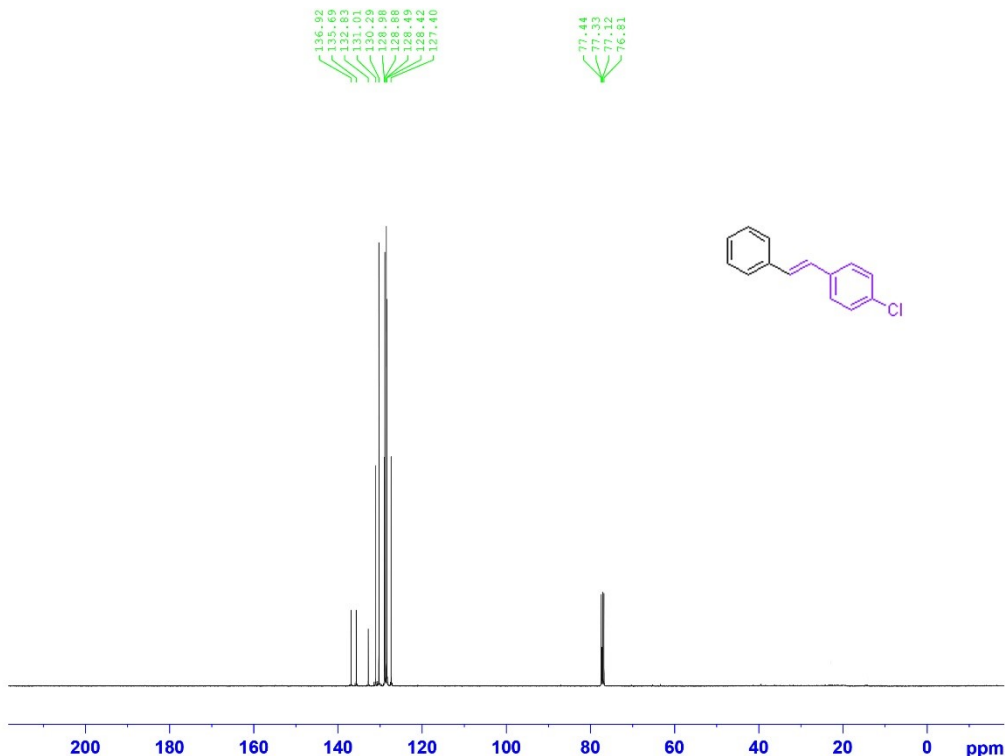

Current Data Parameters  
 NAME JC 3  
 EXNO 2  
 PROCNO 1

F2 - Acquisition Parameters  
 Date\_ 20240523  
 Time 10.11 h  
 INSTRUM AvanceNeo 400  
 PROBHD z163739\_P02 1  
 PULPROG zgpg30  
 TD 65536  
 SOLVENT CDCl3  
 NS 16  
 DS 2  
 SWH 23869.528 Hz  
 FIDRES 0.724609 Hz  
 AQ 1.3762560 sec  
 RG 101  
 DW 21.000 usec  
 DE 4.50 usec  
 TE 293.8 K  
 D1 2.00000000 sec  
 D11 0.53000000 sec  
 TDO 1

----- CHANNEL f1 -----  
 NUCL1 13C  
 P1 2.67 usec  
 PL1 8.00 dB  
 PL1W 105.24999684 W  
 SFO1 400.1516006 MHz

----- CHANNEL f2 -----  
 NUCL2 1H  
 P2 19.00 usec  
 PL2 0.17843001 W  
 SFO2 400.1516006 MHz

F2 - Processing parameters  
 SI 32768  
 SF 100.6177976 MHz  
 WDW RM  
 SSB 0  
 LB 1.00 Hz  
 GB 0  
 PC 1.40

HC-4 AAKASH 1H 2/1/2024  
 CDCL3 {D:\SRC} MSU-Chem 1

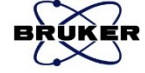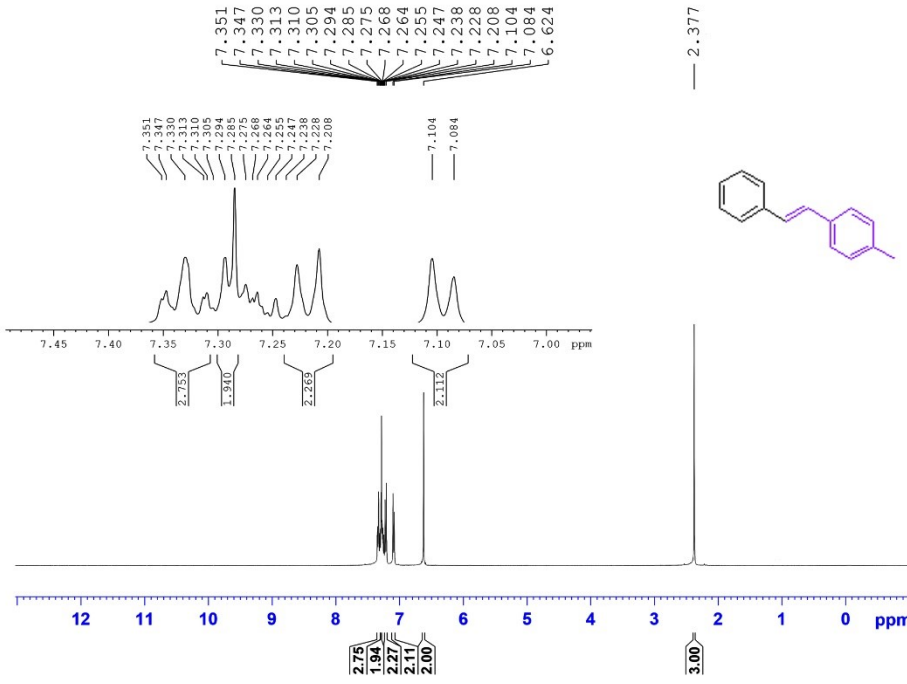

Current Data Parameters  
 NAME HC-4  
 EXPNO 48  
 PROCNO 1

F2 - Acquisition Parameters  
 Date\_ 20240102  
 Time 16.19  
 INSTRUM spect  
 PROBU 3 mm PABBO BB-  
 PULPROG zg30  
 TD 452536  
 SOLVENT CDCl3  
 NS 16  
 DS 2  
 SFO1 400.1524711 MHz  
 FIDRES 0.125483 Hz  
 AQ 3.9845889 sec  
 RE 228  
 DW 60.800 usec  
 DE 6.50 usec  
 TE 294.0 K  
 D1 1.0000000 sec  
 TDO 1

----- CHANNEL f1 -----  
 NUC1 1H  
 P1 15.00 usec  
 PL1 -1.00 dB  
 PL1H 13.59779258 MHz  
 SFO1 400.1524711 MHz

F2 - Processing parameters  
 SI 400.1500000 MHz  
 WDW EM  
 SGB 0  
 LB 0.30 Hz  
 CB 9  
 PC 1.00

JC 4 AKASH CDCL3 13C 22/05/2024

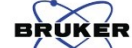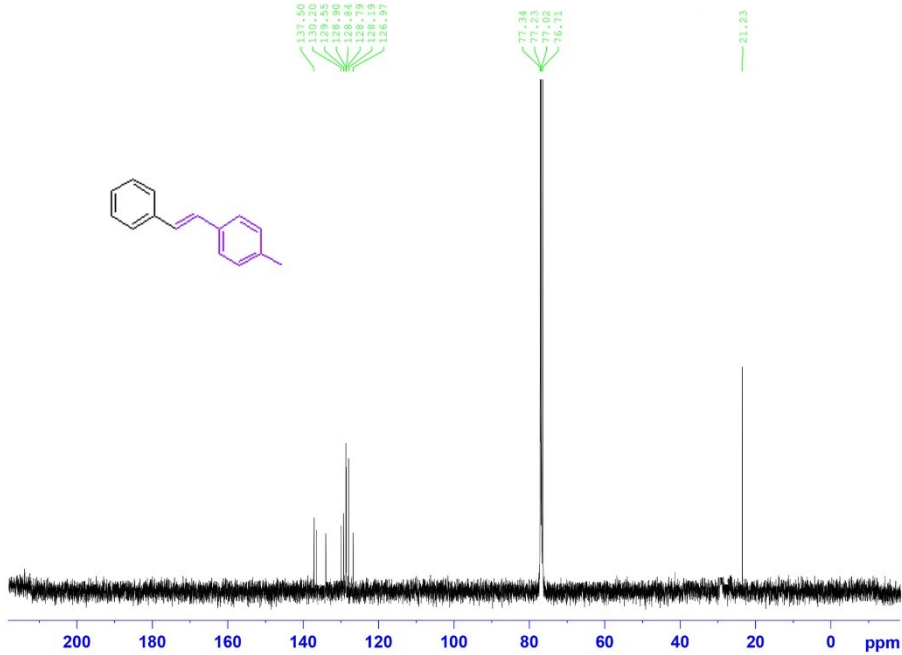

Current Data Parameters  
 NAME JC-4  
 EXPNO 4  
 PROCNO 1

F2 - Acquisition Parameters  
 Date\_ 20240522  
 Time 11.38 h  
 INSTRUM AvanceNeo 400  
 PROBU 1H375-CP2-1  
 PULPROG zgpg30  
 TD 65536  
 SOLVENT CDCl3  
 NS 1024  
 DS 4  
 SFO1 100.6281593 MHz  
 FIDRES 0.146409 Hz  
 AQ 1.3762560 sec  
 RE 101  
 DW 21.000 usec  
 DE 4.50 usec  
 TE 298.0 K  
 D1 2.0000000 sec  
 D11 0.0300000 sec  
 TDO 100.6278193 MHz

NUC1 13C  
 P1 2.47 usec  
 PL 0.00 dB  
 PL1 100.2693664 MHz  
 SFO1 400.1500000 MHz

CPDPRG2 waltz16  
 PCP2 90.00 usec  
 PL2 22.5830018 W  
 PL21 0.17883081 W  
 PL211 0.08971500 W

F2 - Processing parameters  
 SI 100.6177970 MHz  
 WDW EM  
 SGB 0  
 LB 1.00 Hz  
 CB 0  
 PC 1.40

HC-5 AKASH 1H 05/01/2024  
 CDCL3 {D:\SRC} MSU-Chem 1

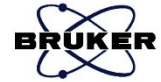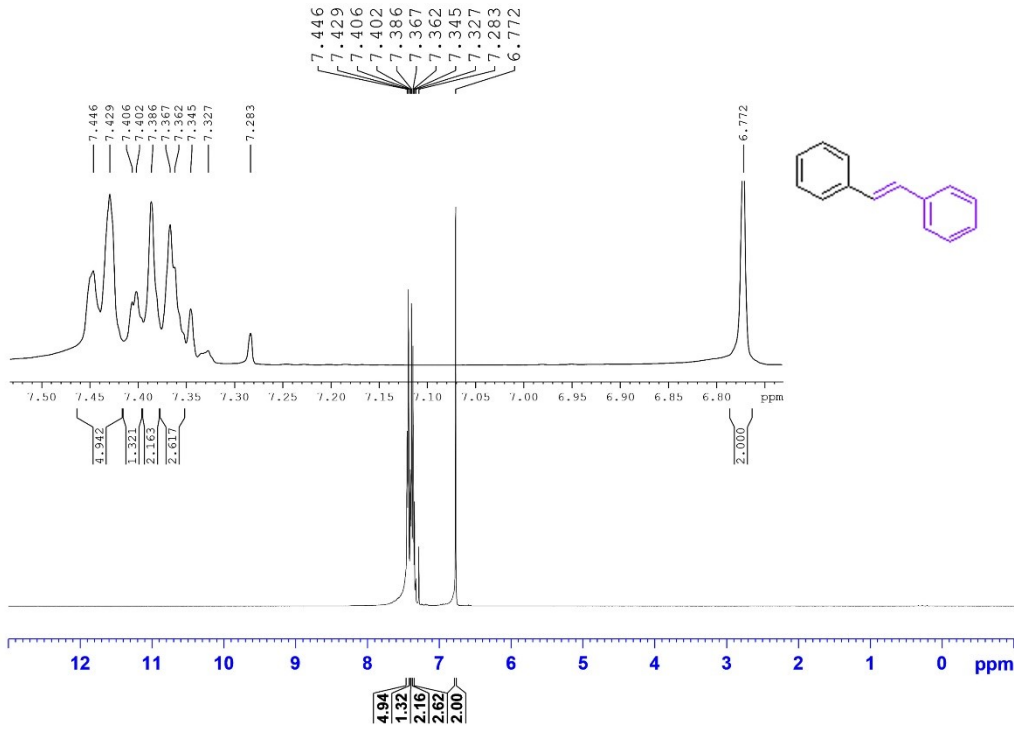

```

Current Data Parameters
NAME          HC-5
EXPNO         4
PROCNO        1

F2 - Acquisition Parameters
Date_         20240105
Time          13.04
INSTRUM       spect
PROBHD        5 mm PABBO BB-
PULPROG       zgpg30
TD            65536
SOLVENT       CDCl3
NS            16
DS            2
SWH           8223.685 Hz
FIDRES        0.175483 Hz
AQ            3.5845889 sec
RG            144
SQ            60.800 usec
DE            6.50 usec
TE            295.2 K
D1            1.00000000 sec
TD0           1

===== CHANNEL f1 =====
NUC1          1H
P1            15.00 usec
PT1           -1.00 dB
PL1M         13.5979398 W
SFO1         400.1524111 MHz

F2 - Processing parameters
SI            32768
SF           400.1509000 MHz
SS           0
SSB          0.50 Hz
GB           0
PC           1.00
  
```

JC 5 AKASH CDCL3 13C 22/05/2024

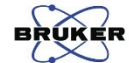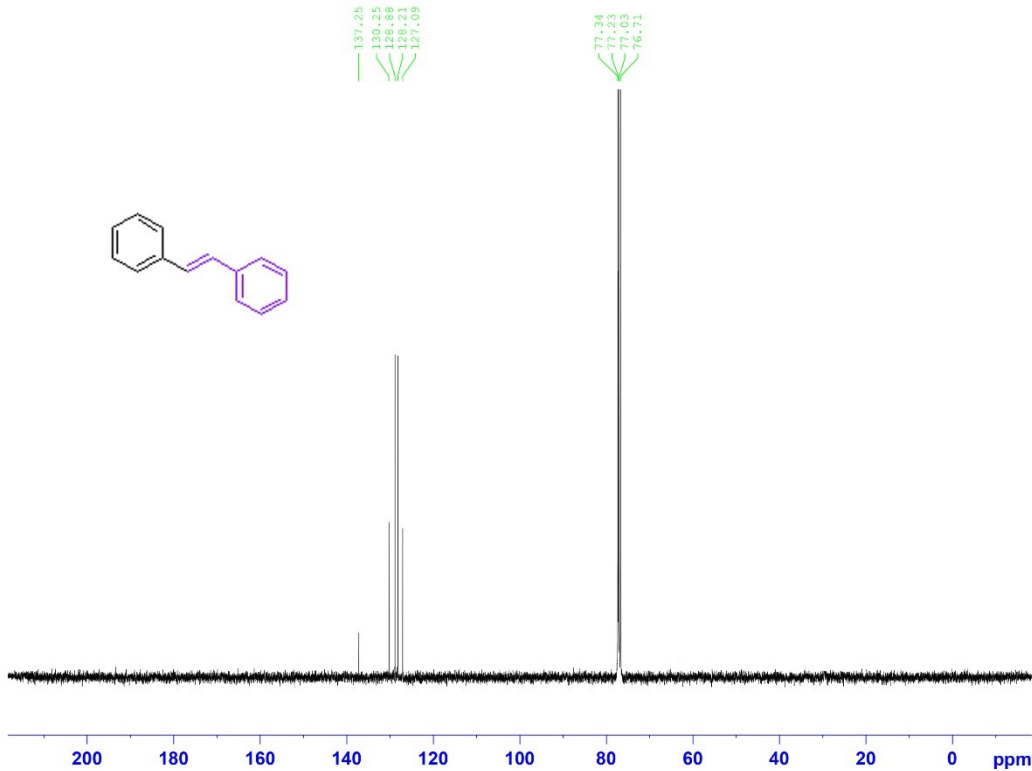

```

Current Data Parameters
NAME          JC 5
EXPNO         13
PROCNO        1

F2 - Acquisition Parameters
Date_         20240522
Time          15.18 h
INSTRUM       Avance600
PROBHD        5mmBBO-CPD (
PULPROG       zgpg30
TD            65536
SOLVENT       CDCl3
NS            613
DS            4
SWH           23600.514 Hz
FIDRES        0.224639 Hz
AQ            1.1765149 sec
RG            191
SQ            21.093 usec
DE            6.50 usec
TE            295.2 K
D1            0.0000000 sec
D11           1
SFO1         100.6278153 MHz
NUC1          13C
P1            2.07 usec
PT1           0.00 dB
PL1M         100.2899444 W
SFO2         400.1516196 MHz
NUC2          1H
CDEPRG1       waltz16
PCPD2         90.00 usec
PZPC2         21.5000000 Hz
PLM12        0.1384101 W
NSM12        0.0000100 W

F2 - Processing parameters
SI            65536
SF           100.6179775 MHz
SS           0
SSB          1.00 Hz
GB           0
PC           1.00
  
```



HC-6 AKASH1H 17/01/2024  
 (D:\SRC) CDCL3 MSU CHEM-1

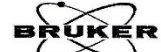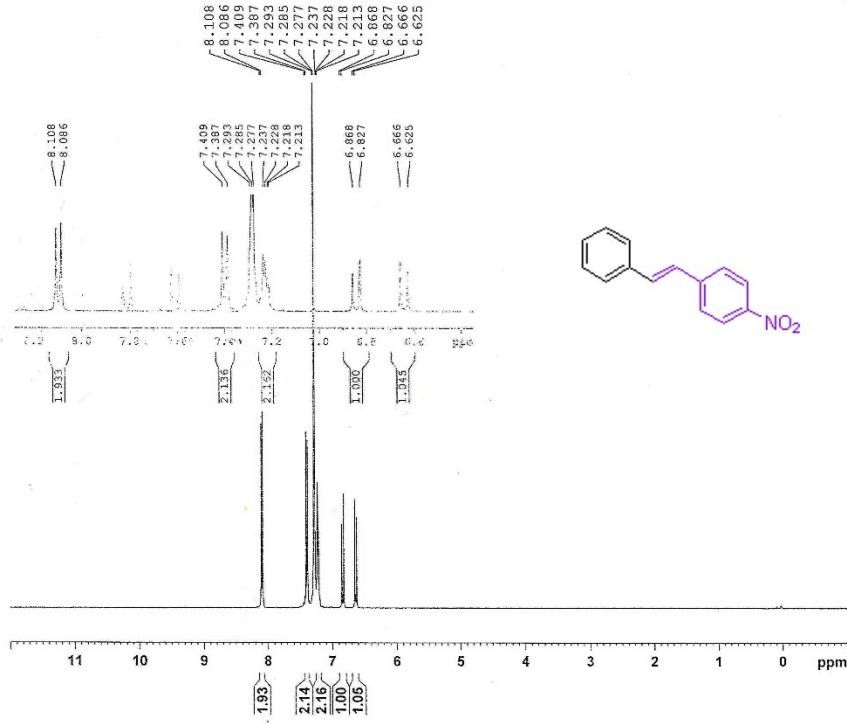

```

NAME      HC -6
EXPNO    5
PROCNO   1
Date_    20240117
Time     17.30
INSTRUM  spect
PROBHD   5 mm PABBO BB-
PULPROG  zgpg
TD        65536
SOLVENT  CDCL3
NS        16
DS        2
SWE       8223.686 Hz
FIDRES   0.129493 Hz
AQ        3.9846397 sec
RG         645
AS         645
DS         60.900 usec
DE         6.30 usec
TE        292.2 K
D1        1.00000000 sec
TDC       1
  
```

```

===== CHANNEL f1 =====
NUC1      1H
P1        16.00 usec
PL1       0.00 dB
PC1       1.00 usec
SFO1      500.136051 MHz
AQ1       3.9846397 sec
RG1       645
AS1       645
DS1       60.900 usec
DE1       6.30 usec
TE1       292.2 K
D11       1.00000000 sec
TDC1      1
  
```

JC-06 13C CDCL3  
 D/DP 9/07/24

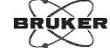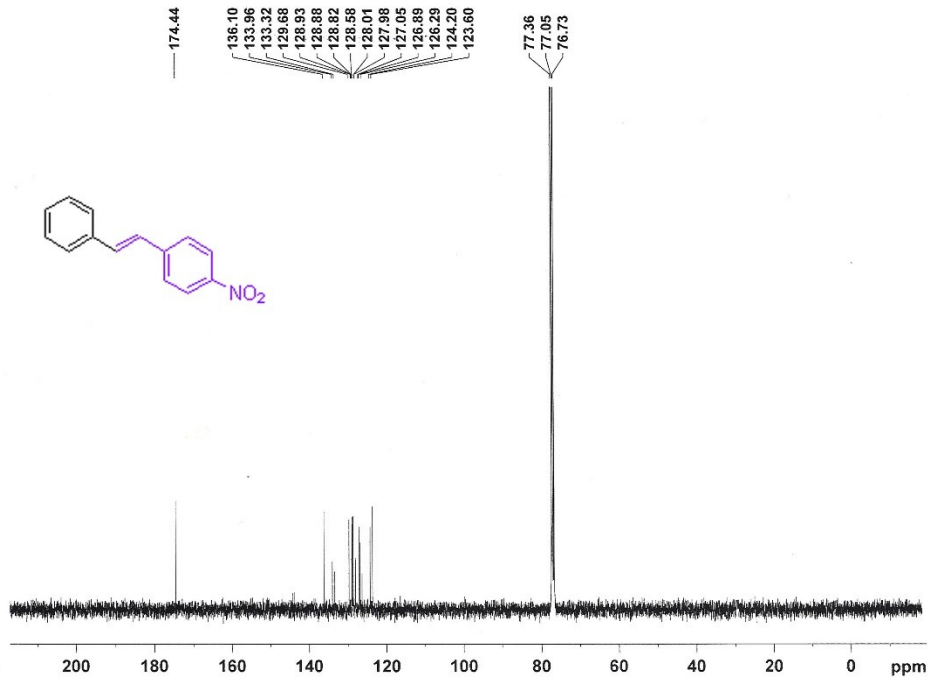

```

===== CHANNEL f1 =====
NAME      JC-06
EXPNO    1
PROCNO   1
Date_    20240907
Time     10.00
INSTRUM  spect
PROBHD   5 mm PABBO BB-
PULPROG  zgpg
TD        65536
SOLVENT  CDCL3
NS        16
DS        2
SWE       125.761 MHz
FIDRES   0.129493 Hz
AQ        3.9846397 sec
RG         645
AS         645
DS         60.900 usec
DE         6.30 usec
TE        292.2 K
D1        1.00000000 sec
TDC       1
  
```

HC-7 AKASH 1H 17/01/2024  
 {D:\SRC} CDCL3 MSU CHEM-1

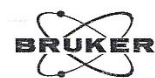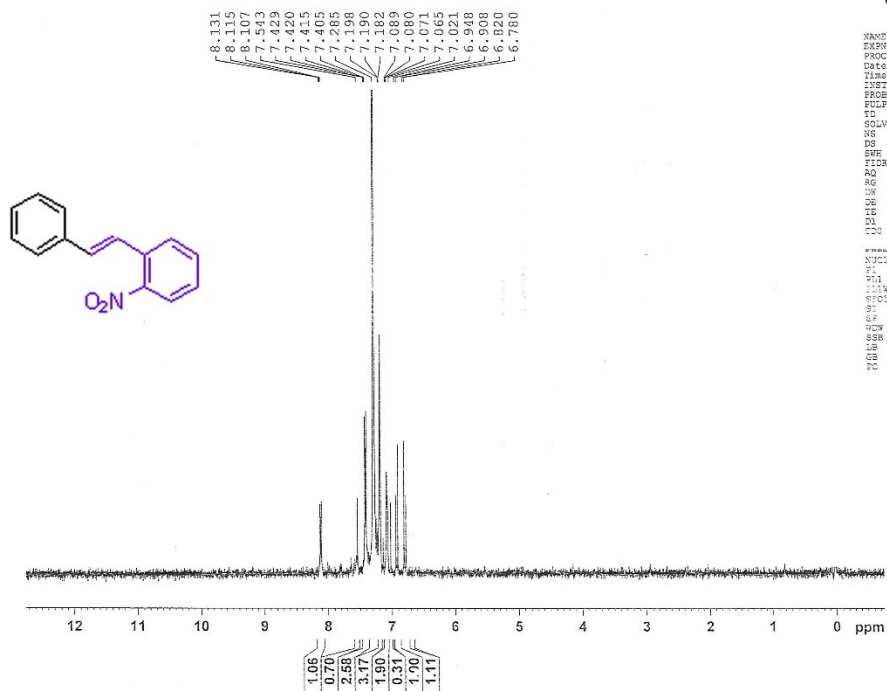

```

NAME      HC-7
EXPNO     1
PROCNO    1
Date_     20240117
Time      17.36
INSTRUM   spect
PROBHD    5 mm PABBO BBI
PULPROG   zgpg30
TD         65536
SOLVENT   CDCl3
NS         16
DS         2
SWH        8223.688 Hz
FIDRES     0.129483 Hz
AQ         3.9846387 sec
RG         812
DM         60.600 usec
DE         6.50 usec
TE         292.2 K
D1         1.00000000 sec
T20
===== CHANNEL f1 =====
NUC1       1H
P1         15.00 usec
PL1        0.00 dB
PL12       13.50 dB
SFO1       400.1464010 MHz
SI         32768
SF         400.1500000 MHz
WDW         EM
SSB         0
LB         0.50 Hz
GB         0
PC         1.00
  
```

JC-07 13C CDCL3  
 D/DP 9/07/24

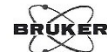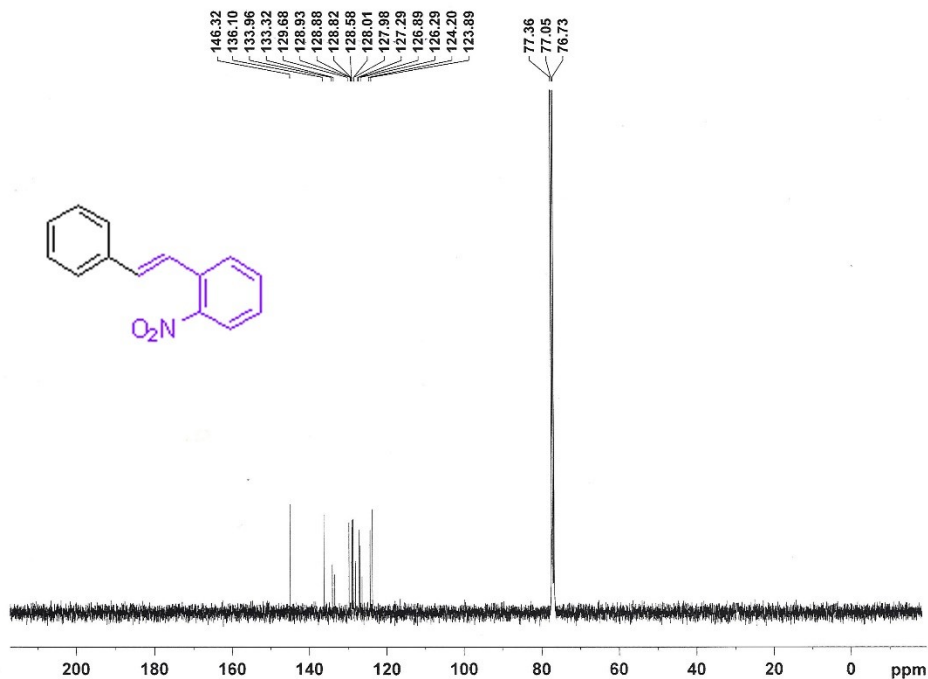

```

===== CHANNEL f1 =====
NUC1       13C
P1         12.00 usec
PL1        0.00 dB
PL12       19.00 dB
SFO1       101.6255125 MHz
SI         65536
SF         101.6255125 MHz
WDW         EM
SSB         0
LB         0.50 Hz
GB         0
PC         1.00
  
```

HC 11 AKASH CDCL3 1H DT 06/03/2024

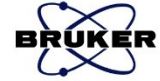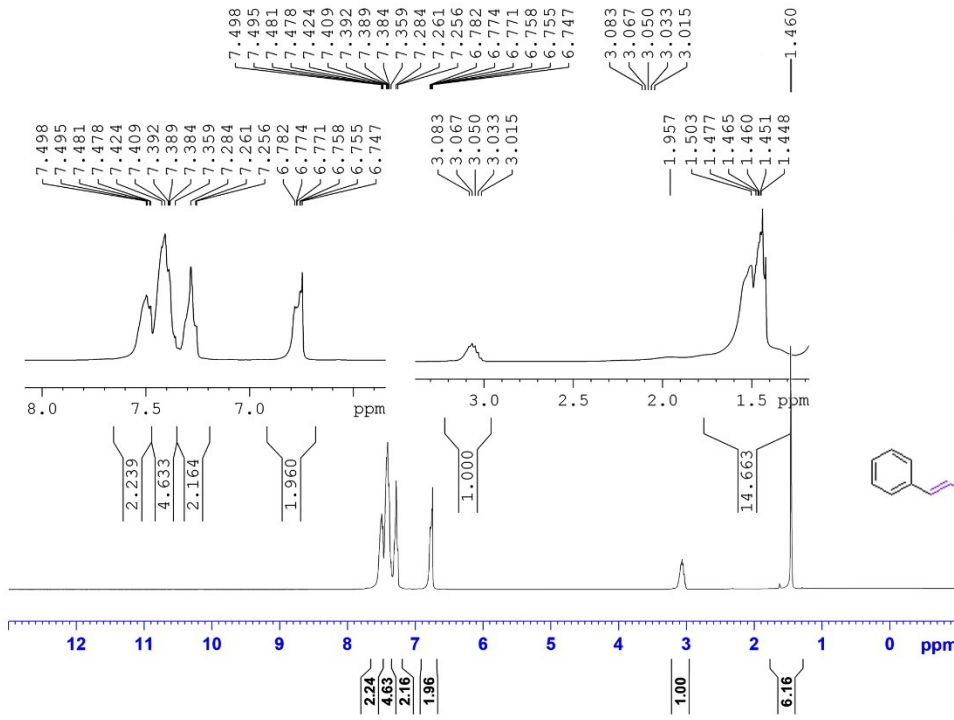

Current Data Parameters  
 NAME HC 11  
 EXPNO 1  
 PROCNO 1  
 F2 - Acquisition Parameters  
 Date 20240306  
 Time 17:45 h  
 INSTRUM AvanceNeo 400  
 PROBRD 1H31P\_0922 (1  
 PULPROG zg30  
 TD 65536  
 SOLVENT CDCl3  
 NS 16  
 DS 2  
 SWH 8196.121 Hz  
 FIDRES 0.250144 Hz  
 AQ 3.957699 sec  
 RG 8  
 DM 61.000 usec  
 DE 13.89 usec  
 TE 298.0 K  
 D1 1.00000000 sec  
 TDO 1  
 SFO1 400.152470 MHz  
 NUC1 1H  
 PD 2.47 usec  
 PL 8.00 usec  
 P1M1 22.58300018 W  
 F2 - Processing parameters  
 SI 62536  
 SF 400.1500000 MHz  
 WDW EM  
 SSB 0  
 LB 0.30 Hz  
 GB 0  
 PC 1.00

HC 11 AAKASH CDCL3 DT 15/03/2024  
 D:/ASD 1H

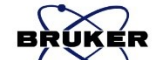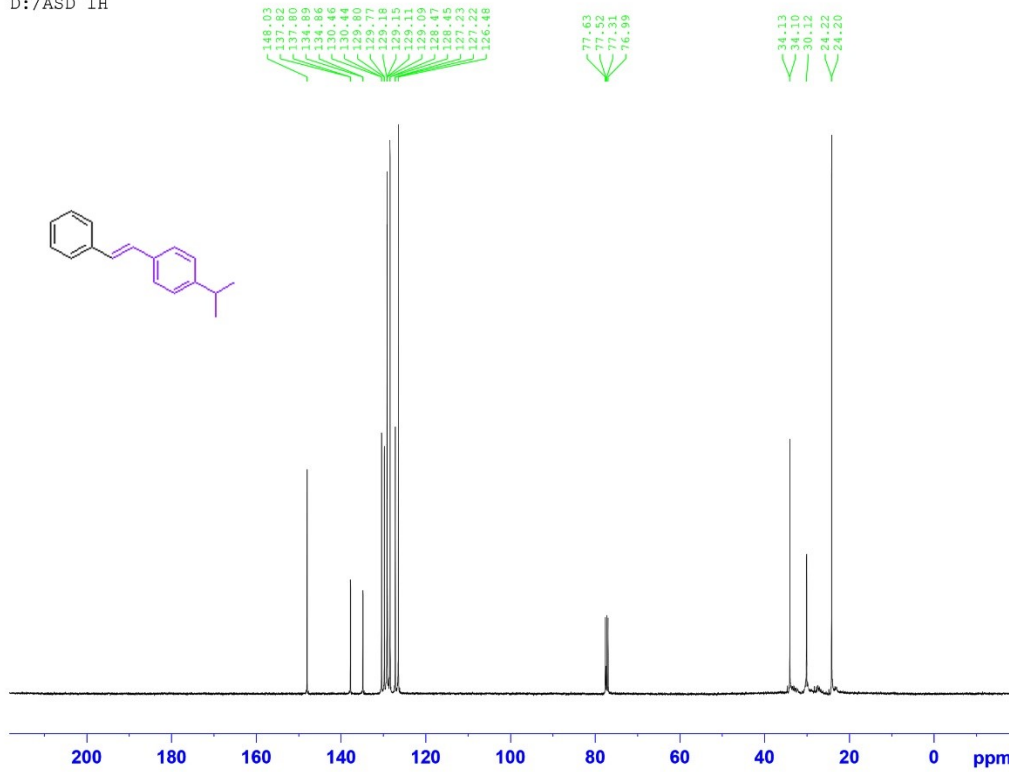

Current Data Parameters  
 NAME HC 11  
 EXPNO 1  
 PROCNO 1  
 F2 - Acquisition Parameters  
 Date 20240315  
 Time 14:56 h  
 INSTRUM AvanceNeo 400  
 PROBRD 1H31P\_0922 (1  
 PULPROG zgpg30  
 TD 65536  
 SOLVENT CDCl3  
 NS 256  
 DS 4  
 SWH 23809.554 Hz  
 FIDRES 0.756608 Hz  
 AQ 1.3762360 sec  
 RG 101  
 DM 21.000 usec  
 DE 6.50 usec  
 TE 298.0 K  
 D1 1.00000000 sec  
 D11 0.03000000 sec  
 TDO 100.4278513 Hz  
 SFO1 100.6278513 MHz  
 NUC1 13C  
 PD 2.47 usec  
 PL 8.00 usec  
 P1M1 105.2698648 W  
 SF2C 400.1516096 MHz  
 MCCA  
 CPDPRG02 waltz160  
 P0C02 50.500 usec  
 P1M2 21.58300018 W  
 P1M12 0.37830000 W  
 P1M13 0.09975100 W  
 F2 - Processing parameters  
 SI 65536  
 SF 100.6177975 MHz  
 WDW EM  
 SSB 0  
 LB 1.00 Hz  
 GB 0  
 PC 1.40

HC 12 AKASH CDCL3 1H DT 06/03/2024

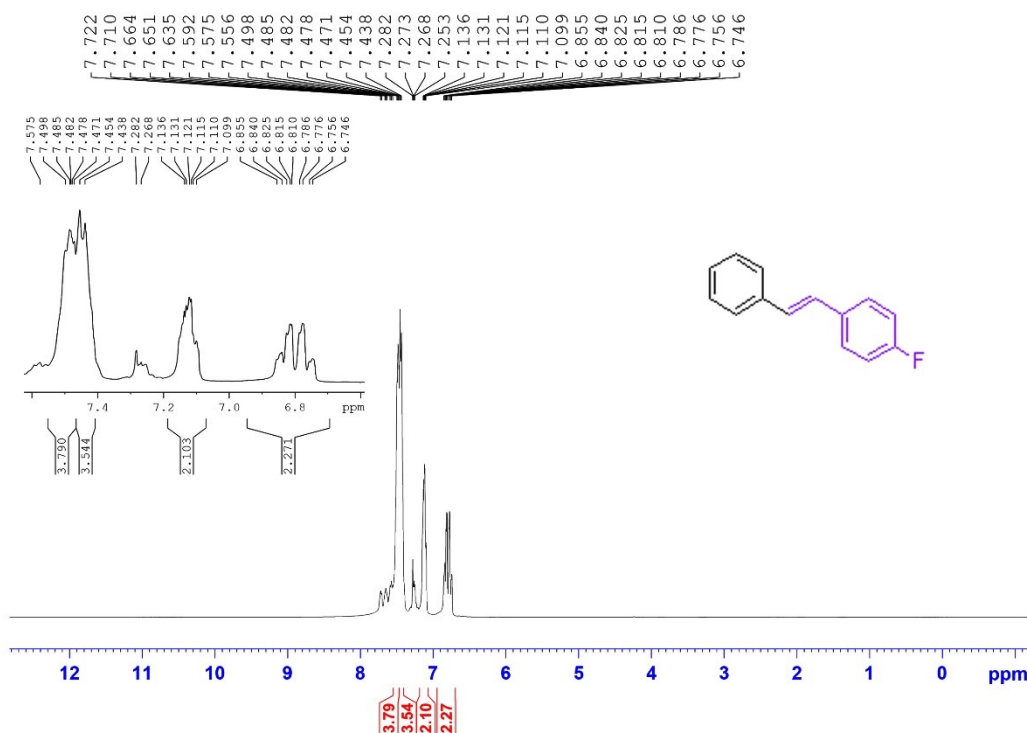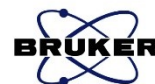

Current Data Parameters  
 NAME HC 12  
 EXPNO 1  
 PROCNO 1

F2 - Acquisition Parameters  
 Date\_ 20240306  
 Time\_ 18.00 h  
 INSTRUM AvanceNeo 400  
 PROBHD zgpg30 0922 ( )  
 PULPROG zgpg30  
 TD 65536  
 SOLVENT CDCl3  
 NS 4  
 DS 4  
 SWH 816.721 Hz  
 FIDRES 0.250144 Hz  
 AQ 3.351639 sec  
 RG 9  
 DW 61.000 usec  
 DE 13.89 usec  
 TE 298.2 K  
 D1 1.0000000 sec  
 SFO1 400.1524789 MHz  
 NUC1 1H  
 P0 2.67 usec  
 PL1 22.5830018 W  
 PL11 22.5830018 W

F2 - Processing parameters  
 SI 65536  
 SF 400.150000 MHz  
 WDM EM  
 SSB 0  
 LB 0.30 Hz  
 GB 0  
 PC 1.00

HC 12 AAKASH CDCL3 DT 15/03/2024  
 D:/ASD 1H

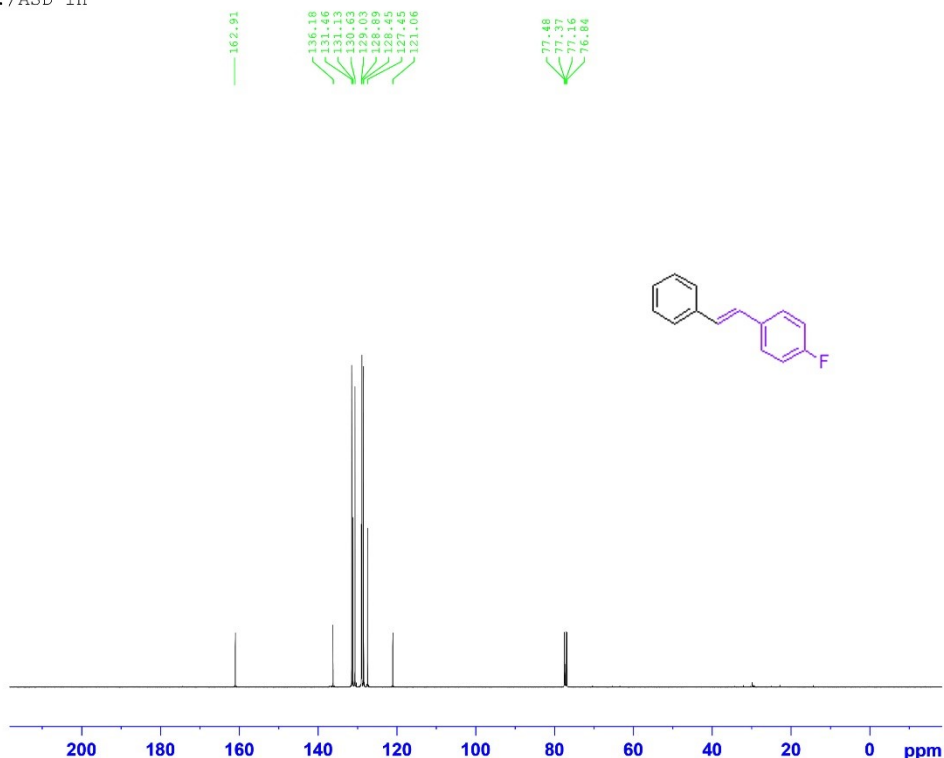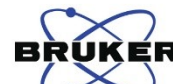

Current Data Parameters  
 NAME HC 12  
 EXPNO 60  
 PROCNO 1

F2 - Acquisition Parameters  
 Date\_ 20240316  
 Time\_ 15.19 h  
 INSTRUM AvanceNeo 400  
 PROBHD zgpg30 0922 ( )  
 PULPROG zgpg30  
 TD 65536  
 SOLVENT CDCl3  
 NS 256  
 DS 4  
 SWH 23809.524 Hz  
 FIDRES 0.726609 Hz  
 AQ 1.3762560 sec  
 RG 101  
 DW 21.000 usec  
 DE 6.50 usec  
 TE 298.2 K  
 D1 2.0000000 sec  
 D11 0.03000000 sec  
 TD0 1  
 SFO1 100.6278593 MHz  
 NUC1 13C  
 P0 2.67 usec  
 PL1 8.00 usec  
 PLW1 105.2699664 W  
 SFO2 400.1516006 MHz  
 NUC2 1H  
 CPDPRG2 waltz65  
 PCPD2 90.00 usec  
 PLW2 22.5830018 W  
 PLW12 0.17843001 W  
 PLW13 0.08975100 W

F2 - Processing parameters  
 SI 32768  
 SF 100.6177975 MHz  
 WDM EM  
 SSB 0  
 LB 1.00 Hz  
 GB 0  
 PC 1.40

HC 15 1H CDCL3 20/04/2024

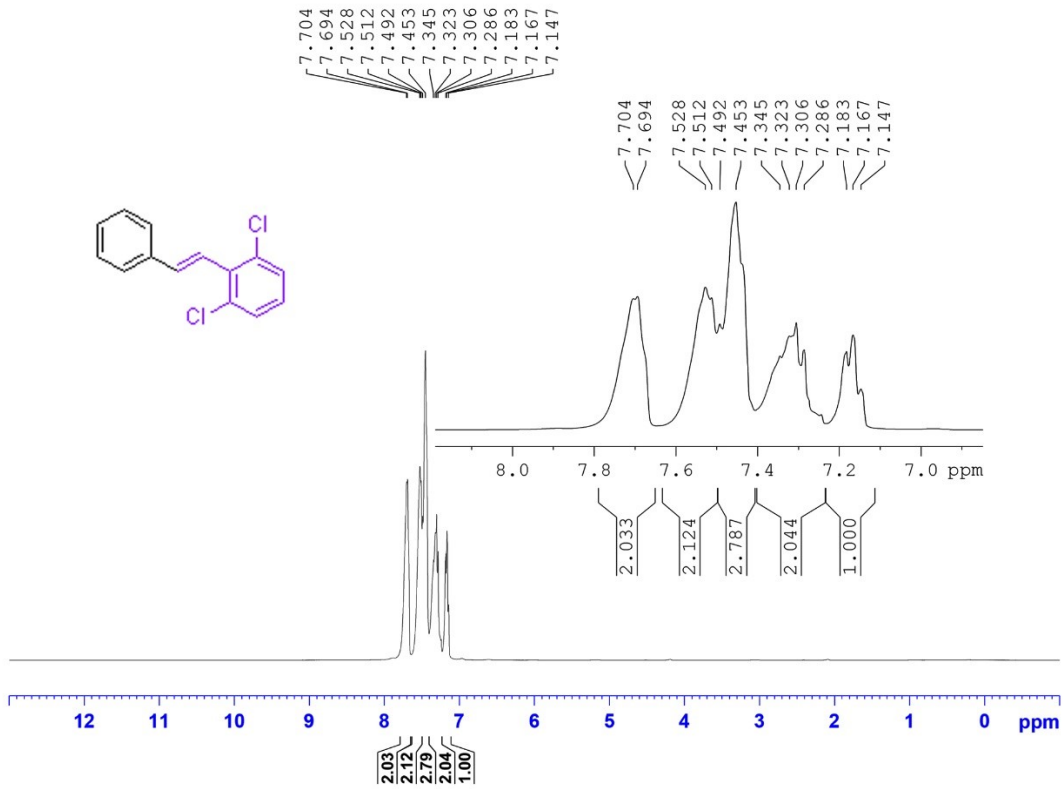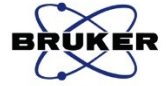

```

Current Data Parameters
NAME          HC 15
EXPNO         4
PROCNO        1

F2 - Acquisition Parameters
Date_         20240420
Time          17:02 h
INSTRUM       AvanceNeo 400
PROBHD        Z163739_0922 (
PULPROG       zg30
TD            65536
SOLVENT       CDCl3
NS           16
DS            2
SWE           8196.721 Hz
FIDRES       0.250144 Hz
AQ           3.9976959 sec
RG           9
DW           61.000 usec
DE           13.89 usec
TE           298.0 K
D1           1.00000000 sec
TDO          1
SF01         400.1524709 MHz
NUC1          1H
PQ           2.47 usec
PI           8.00 usec
PLW1         22.58300018 W

F2 - Processing parameters
SI           400.1500000 MHz
SF           EM
WDW          EM
SSB          0
LB           0.30 Hz
GB           0
PC           1.00
    
```

HC 15 13C CDCL3 20/04/2024

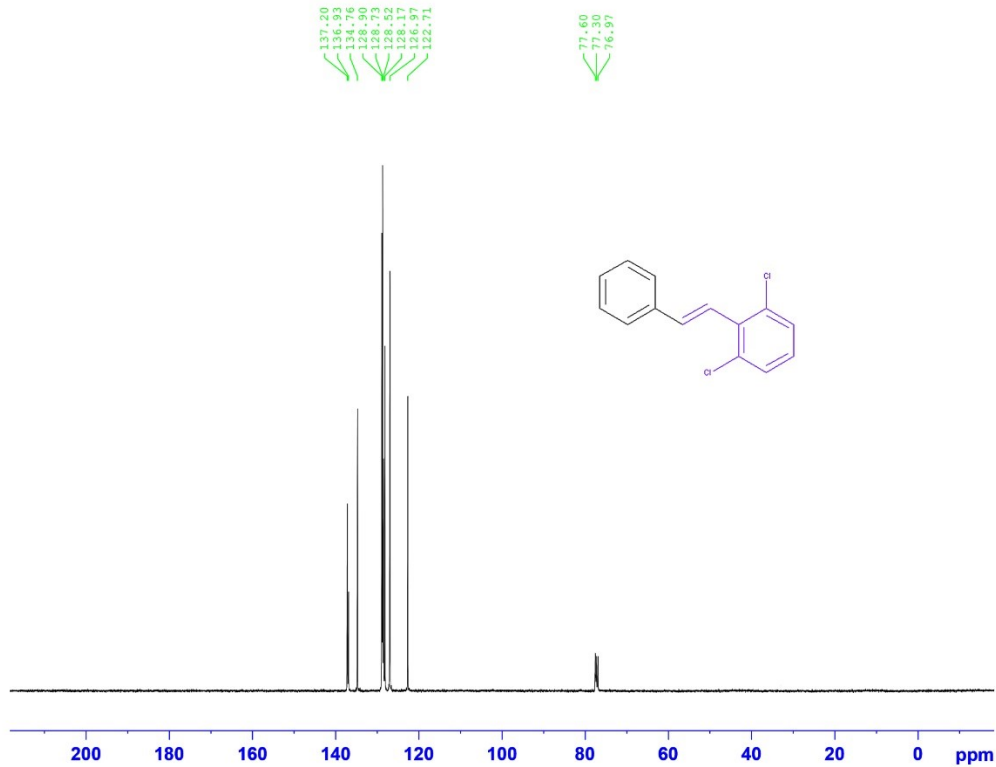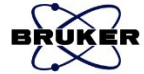

```

Current Data Parameters
NAME          HC 15
EXPNO         8
PROCNO        1

F2 - Acquisition Parameters
Date_         20240420
Time          17:27 h
INSTRUM       AvanceNeo 400
PROBHD        Z163739_0922 (
PULPROG       zgpg30
TD            65536
SOLVENT       CDCl3
NS           256
DS            4
SWE           23809.524 Hz
FIDRES       0.726609 Hz
AQ           1.3762560 sec
RG           101
DW           21.000 usec
DE           6.50 usec
TE           298.0 K
D1           2.00000000 sec
D11          0.03000000 sec
TDO          1
SF01         100.6278953 MHz
NUC1          13C
PQ           2.47 usec
PI           8.00 usec
PLW1         105.26999664 W
SFO2         400.1516006 MHz
NUC2          1H
CPDPRG2       waltz16
PCDE2         90.00 usec
PLW2         22.58300018 W
PLW12        0.17849001 W
PLW13        0.08975100 W

F2 - Processing parameters
SI           32768
SF           100.6177715 MHz
WDW          EM
SSB          0
LB           1.00 Hz
GB           0
PC           1.40
    
```

HC 16 1H CDCL3 20/04/2024

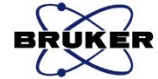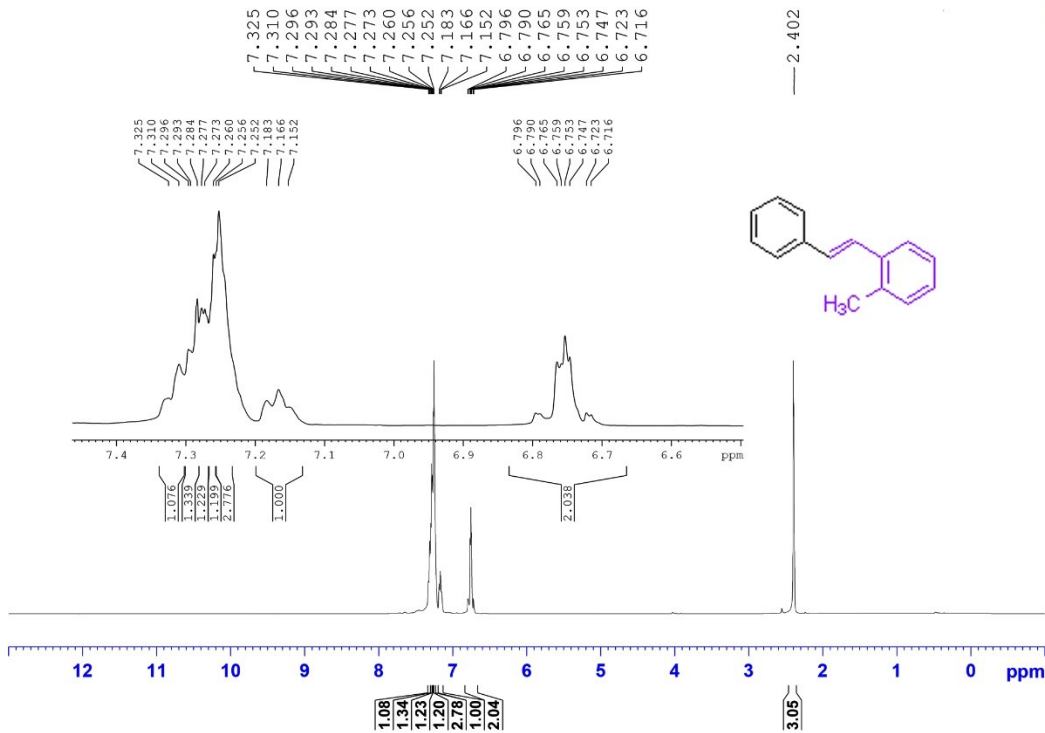

Current Data Parameters  
 NAME HC 16  
 EXPNO 6  
 PROCNO 1

F2 - Acquisition Parameters  
 Date\_ 20240420  
 Time 17.09 h  
 INSTRUM AvanceNeo 400  
 PROBHD Z163739\_0922 (4  
 PULPROG zgpg30  
 TD 65536  
 SOLVENT CDCl3  
 NS 16  
 DS 2  
 SWE 8156.721 Hz  
 FIDRES 0.250144 Hz  
 AQ 3.9576959 sec  
 RG 16  
 DN 61.000 usec  
 DE 13.89 usec  
 TE 298.0 K  
 D1 1.0000000 sec  
 TDO 1  
 SFO1 400.1524709 MHz  
 NUC1 1H  
 P0 2.67 usec  
 P1 8.00 usec  
 PLW1 22.58300018 W

F2 - Processing parameters  
 SI 65536  
 SF 400.1500000 MHz  
 WDW EM  
 SSB 0  
 LB 0.30 Hz  
 GB 0  
 PC 1.00

HC 16 13C CDCL3 20/04/2024

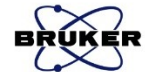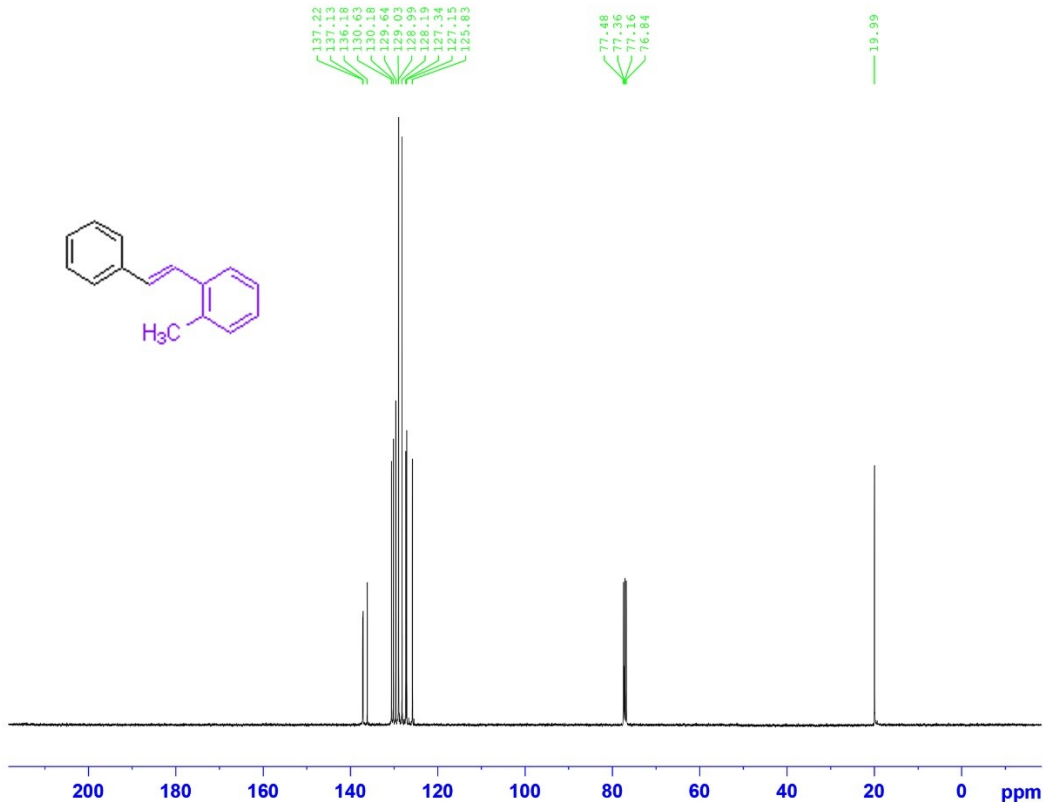

Current Data Parameters  
 NAME HC 16  
 EXPNO 10  
 PROCNO 1

F2 - Acquisition Parameters  
 Date\_ 20240420  
 Time 18.00 h  
 INSTRUM AvanceNeo 400  
 PROBHD Z163739\_0922 (4  
 PULPROG zgpg30  
 TD 65536  
 SOLVENT CDCl3  
 NS 491  
 DS 4  
 SWE 23809.554 Hz  
 FIDRES 0.726609 Hz  
 AQ 1.3762560 sec  
 RG 101  
 DN 21.000 usec  
 DE 4.50 usec  
 TE 298.0 K  
 D1 2.0000000 sec  
 D11 0.0300000 sec  
 TDO 1  
 SFO1 100.6278593 MHz  
 NUC1 13C  
 P0 2.67 usec  
 P1 8.00 usec  
 PLW1 105.2699664 W  
 SFO2 400.1516006 MHz  
 NUC2 1H  
 CPDPRG2 waltz165  
 PCPD2 80.00 usec  
 PLW2 22.58300018 W  
 PLW12 0.17843001 W  
 PLW13 0.08975100 W

F2 - Processing parameters  
 SI 65536  
 SF 100.6177975 MHz  
 WDW EM  
 SSB 0  
 LB 1.00 Hz  
 GB 0  
 PC 1.40
